# Supplementary material for: Exome sequences versus sequential gene testing in the UK highly specialised Service for Limb Girdle Muscular Dystrophy
Source: Springer Nature journal article supplement (doi:10.1186/s13023-017-0699-9), 2017-09-06
Supplement: MOESM1 [file 15018514]

| family no | affected individual ID | Inheritance | Consanguineous | sex | age of onset* | CK             | MB  | previous genes screened (by any method)                                                            | no. genes tested | NGS gene panels tested | WES institute | no. affected individuals exomed | no. unaffected individuals exomed | undiagnosed / relevant disease gene if diagnosed |
|-----------|------------------------|-------------|----------------|-----|---------------|----------------|-----|----------------------------------------------------------------------------------------------------|------------------|------------------------|---------------|---------------------------------|-----------------------------------|--------------------------------------------------|
| WES1      | 1                      | AR          | no             | m   | adult         | elevated <1000 | yes | DMD, SM1, CAV3, ANO5, MADD, PYGM, CPT2                                                             | 7                |                        | DeCode        | 2                               | 0                                 | undiagnosed                                      |
| WES1      | 2                      |             |                | f   | adult         | elevated <1000 | no  |                                                                                                    |                  |                        |               |                                 |                                   |                                                  |
| WES2      | 1                      | AR          | yes            | f   | childhood     | elevated <1000 | no  | FKRP, CAPN3, SMN1, DYSF                                                                            | 4                |                        | DeCode        | 2                               | 0                                 | ZAK                                              |
| WES2      | 2                      |             |                | m   | childhood     | elevated >1000 | yes |                                                                                                    |                  |                        |               |                                 |                                   |                                                  |
| WES3      | 1                      | AR          | no             | m   | childhood     | normal         | yes | FSHD1, LMNA, VCP                                                                                   | 3                |                        | DeCode        | 2                               | 0                                 | undiagnosed                                      |
| WES3      | 2                      |             |                | f   | adult         | normal         | yes |                                                                                                    |                  |                        |               |                                 |                                   |                                                  |
| WES4      | 1                      | AR          | yes            | f   | adult         | elevated <1000 | yes | FKRP, DMD, SCCA, SGCB, SGCD, SGGG, CAPN3                                                           | 7                |                        | DeCode        | 3                               | 1                                 | undiagnosed                                      |
| WES4      | 2                      |             |                | m   | adult         | not recorded   | yes |                                                                                                    |                  |                        |               |                                 |                                   |                                                  |
| WES4      | 3                      |             |                | f   | not recorded  | not recorded   | no  |                                                                                                    |                  |                        |               |                                 |                                   |                                                  |
| WES5      | 1                      | AR          | no             | f   | adult         | normal         | yes | BAG3, FKRP, FSHD1, DM2, CAPN3, SMN1, LMNA, DES, MYOT, VCP, FHL1                                    | 11               |                        | DeCode        | 3                               | 0                                 | TTN                                              |
| WES5      | 2                      |             |                | f   | teens         | normal         | yes |                                                                                                    |                  |                        |               |                                 |                                   |                                                  |
| WES5      | 3                      |             |                | f   | teens         | normal         | yes |                                                                                                    |                  |                        |               |                                 |                                   |                                                  |
| WES6      | 1                      | AR          | yes            | m   | childhood     | elevated >1000 | yes | LMNA, DOK7, FKRP ANO5                                                                              | 4                |                        | DeCode        | 1                               | 5                                 | undiagnosed                                      |
| WES7      | 1                      | AR          | no             | m   | adult         | elevated >1000 | yes | ANO5, DYSF, CAPN3, TTN*, LMNA, GNE                                                                 | 6                |                        | DeCode        | 2                               | 2                                 | undiagnosed                                      |
| WES7      | 2                      |             |                | m   | adult         | elevated >1000 | no  |                                                                                                    |                  |                        |               |                                 |                                   |                                                  |
| WES8      | 1                      | sporadic    | no             | m   | childhood     | elevated <1000 | yes | LMNA, FHL1, MSTN, PTRF                                                                             | 4                |                        | DeCode        | 1                               | 2                                 | undiagnosed                                      |
| WES9      | 1                      | sporadic    | no             | f   | childhood     | elevated <1000 | yes | BAG3, LMNA, SEPN1, FHL1, COL6A1, COL6A2, COL6A3                                                    | 7                |                        | Broad         | 1                               | 1                                 | COL6A1                                           |
| WES10     | 1                      | AR          | no             | m   | teens         | elevated <1000 | yes | DM1, DM2, BAG3, DES, MYOT, CRYAB, FHL1                                                             | 7                |                        | Broad         | 2                               | 2                                 | undiagnosed                                      |
| WES10     | 2                      |             |                | f   | adult         | elevated <1000 | yes |                                                                                                    |                  |                        |               |                                 |                                   |                                                  |
| WES11     | 1                      | AR          | no             | f   | childhood     | normal         | yes | FKRP, SEPN1, LMNA, CAPN3, SMN1, POMT1, POMT2, POMGnT1, LARGE, FKTN, FHL1                           | 11               |                        | Broad         | 2                               | 2                                 | undiagnosed                                      |
| WES11     | 2                      |             |                | m   | childhood     | normal         | no  |                                                                                                    |                  |                        |               |                                 |                                   |                                                  |
| WES12     | 1                      | sporadic    | no             | m   | childhood     | elevated <1000 | yes | LMNA, COL6A1, COL6A2, COL6A3, FHL1                                                                 | 5                |                        | Broad         | 1                               | 0                                 | undiagnosed                                      |
| WES13     | 1                      | AD          | no             | m   | childhood     | not recorded   | no  | MYH2, MYH7, LMNA                                                                                   | 3                |                        | Broad         | 4                               | 0                                 | PIEZO2                                           |
| WES13     | 2                      |             |                | m   | childhood     | not recorded   | no  |                                                                                                    |                  |                        |               |                                 |                                   |                                                  |
| WES13     | 3                      |             |                | m   | childhood     | not recorded   | no  |                                                                                                    |                  |                        |               |                                 |                                   |                                                  |
| WES13     | 4                      |             |                | f   | childhood     | not recorded   | no  |                                                                                                    |                  |                        |               |                                 |                                   |                                                  |
| WES14     | 1                      | sporadic    | yes            | f   | teens         | elevated >1000 | yes | ANO5, FKRP, CAPN3                                                                                  | 3                |                        | Broad         | 1                               | 0                                 | undiagnosed                                      |
| WES15     | 1                      | sporadic    | no             | m   | childhood     | elevated >1000 | yes | LMNA, DYSF, ANO5, CAPN3, DMD, FKRP, AR, SCGA, SCGB, SGGG, SCGD, POMT1, POMT2, POMGnT1, LARGE, FKTN | 16               |                        | Broad         | 1                               | 2                                 | undiagnosed                                      |
| WES16     | 1                      | sporadic    | no             | m   | adult         | normal         | yes | COL6A1, COL6A2, COL6A3, LMNA, FHL1, SEPN1, DM2, BAG3, CAPN3                                        | 9                |                        | Broad         | 1                               | 2                                 | undiagnosed                                      |
| WES17     | 1                      | sporadic    | no             | f   | adult         | elevated >1000 | yes | DNAJB6, TTN*, CAPN3, ANO5, FKRP, LMNA                                                              | 6                |                        | Broad         | 1                               | 2                                 | undiagnosed                                      |
| WES18     | 1                      | sporadic    | no             | f   | childhood     | not recorded   | yes |                                                                                                    | 0                |                        | Broad         | 1                               | 0                                 | TTN                                              |
| WES19     | 1                      | sporadic    | no             | m   | childhood     | elevated >1000 | yes | DMD, CAPN3, FKRP, LMNA, FHL1, TTN*, CCDC78, DYSF, DNAJB6, ANO5                                     | 10               |                        | Broad         | 1                               | 0                                 | TTN                                              |
| WES20     | 1                      | sporadic    | no             | m   | childhood     | elevated >1000 | yes | ANO5, POMT1, POMT2, POMGnT1, LARGE, FKTN, CAPN3, CAV3, FKRP, LMNA                                  | 10               |                        | Broad         | 1                               | 2                                 | undiagnosed                                      |
| WES21     | 1                      | sporadic    | no             | m   | childhood     | elevated >1000 | yes | DMD, LMNA, FHL1, CAPN3, SCGA, SCGB, SGGG, SCGD, COL6A1, COL6A2, COL6A3                             | 11               |                        | Broad         | 1                               | 0                                 | undiagnosed                                      |
| WES22     | 1                      | sporadic    | no             | f   | adult         | elevated <1000 | yes | VCP, DES, MYOT, CRYAB, FSHD1                                                                       | 5                |                        | Broad         | 1                               | 0                                 | undiagnosed                                      |
| WES23     | 1                      | AR          | no             | m   | childhood     | normal         | yes | LMNA, FHL1, SEPN1, RYR1, DOK7, DNM2, ACTA1                                                         | 7                |                        | DeCode        | 2                               | 0                                 | TTN                                              |
| WES23     | 2                      |             |                | m   | childhood     | not recorded   | no  |                                                                                                    |                  |                        |               |                                 |                                   |                                                  |
| WES24     | 1                      | AR          | yes            | f   | childhood     | normal         | yes | DOK7, RYR1, LMNA, RAPS, CHRNG                                                                      | 5                |                        | Broad         | 1                               | 2                                 | undiagnosed                                      |
| WES25     | 1                      | sporadic    | no             | m   | adult         | elevated >1000 | yes | CAPN3, FHL1, ANO5, FSHD1, LMNA, FKRP, TPM3, FKRP, FKTN, POMT1, POMT2, POMGnT1, LARGE               | 13               |                        | Broad         | 1                               | 0                                 | GMPPB                                            |
| WES26     | 1                      | AR          | no             | m   | childhood     | elevated <1000 | yes | COL6A1, COL6A2, COL6A3, ANO5, CAPN3, LMNA, DMD                                                     | 7                |                        | Broad         | 2                               | 0                                 | LAMA2                                            |
| WES26     | 2                      |             |                | m   | childhood     | elevated <1000 | no  |                                                                                                    |                  |                        |               |                                 |                                   |                                                  |
| WES27     | 1                      | AR          | no             | m   | teens         | elevated >1000 | yes | FKRP, DES, MYOT, ZASP, CRYAB, CAPN3, ANO5, SCGA, SCGB, SGGG, SCGD, DMD, DNAJB6, TTN*               | 14               |                        | Broad         | 1                               | 0                                 | undiagnosed                                      |
| WES28     | 1                      | AR          | no             | f   | adult         | normal         | yes | DNAJB6, TTN*, ZASP, CRYAB, MYOT, DES, SMN1, ANO5, CAPN3, DM2, DM1                                  | 11               |                        | Broad         | 2                               | 0                                 | undiagnosed                                      |
| WES28     | 2                      |             |                | f   | adult         | normal         | yes |                                                                                                    |                  |                        |               |                                 |                                   |                                                  |

| family no | affected individual ID | Inheritance        | Consanguineous | sex | age of onset* | CK             | MB           | previous genes screened (by any method)                                                                 | no. genes tested | NGS gene panels tested                |       | no. affected individuals exomed | no. unaffected individuals exomed | undiagnosed / relevant disease gene if diagnosed |  |
|-----------|------------------------|--------------------|----------------|-----|---------------|----------------|--------------|---------------------------------------------------------------------------------------------------------|------------------|---------------------------------------|-------|---------------------------------|-----------------------------------|--------------------------------------------------|--|
| WES29     | 1                      | AR                 | no             | f   | childhood     | elevated >1000 | yes          | FKRP, COL6A1, COL6A2, COL6A3, LMNA, FHL1, SCGA, SCGB, SCGG, SCGD                                        | 10               |                                       | Broad | 2                               | 0                                 | TTN                                              |  |
| WES29     | 2                      |                    |                | m   | childhood     | elevated >1000 | no           |                                                                                                         |                  |                                       |       |                                 |                                   |                                                  |  |
| WES30     | 1                      | X-linked           | no             | m   | childhood     | elevated <1000 | yes          | LMNA, SMA1, EMD, FHL1, DMD                                                                              | 5                |                                       | Broad | 2                               | 0                                 | MYH7                                             |  |
| WES30     | 2                      |                    |                | m   | childhood     | not recorded   | yes          |                                                                                                         |                  |                                       |       |                                 |                                   |                                                  |  |
| WES31     | 1                      | sporadic           | no             | m   | adult         | elevated <1000 | yes          | DOK7, DM1, DM2, VCP, MYOT, DES, CRYAB, ZASP, DNAJB6, TTN*                                               | 10               |                                       | Broad | 1                               | 0                                 | MEGF10                                           |  |
| WES32     | 1                      | sporadic           | no             | m   | adult         | elevated >1000 | yes          | ANOS, DES, MYOT, FSHD1, FRKP, CAPN3, FHL1, DYSF, TTN*, SMN1, SGCA, SGCB, SCGC, SGCD                     | 14               |                                       | Broad | 1                               | 0                                 | LAMA2                                            |  |
| WES33     | 1                      | sporadic           | no             | m   | adult         | elevated >1000 | yes          | FKRP, VCP, ANOS, CAPN3, SCGA, SCGB, SCGG, SCGD, DNAJB6, TTN*                                            | 10               |                                       | Broad | 1                               | 0                                 | undiagnosed                                      |  |
| WES34     | 1                      | sporadic           | no             | m   | adult         | elevated >1000 | yes          | GNE, FSHD1, ANOS, VCP                                                                                   | 14               |                                       | Broad | 1                               | 0                                 | undiagnosed                                      |  |
| WES35     | 1                      | sporadic           | no             | f   | childhood     | normal         | yes          | MYH7, SEPN1, RYR1, FHL1, DOK7, CFL2, ALG2                                                               | 7                |                                       | Broad | 1                               | 0                                 | undiagnosed                                      |  |
| WES36     | 1                      | sporadic           | no             | f   | adult         | elevated >1000 | yes          | DMD, DM2, DM1, PABN, DNAJB6, ZASP, DES, MYOT, CRYAB, VCP, TTN*                                          | 11               |                                       | Broad | 1                               | 0                                 | undiagnosed                                      |  |
| WES37     | 1                      | sporadic           | no             | m   | adult         | elevated >1000 | yes          | FHL1, LMNA, CAPN3, CAV3, FKRP, DM2, VCP, DES, CRYAB, ZASP, MYOT, TTN*, PABN1, ANOS, DM1, DNAJB6         | 16               |                                       | Broad | 1                               | 0                                 | undiagnosed                                      |  |
| WES38     | 1                      | sporadic           | no             | m   | adult         | elevated <1000 | yes          | TTN*, ZASP, CRYAB, MYOT, DES, GNE, VCP, MYH7, FSHD1                                                     | 9                |                                       | Broad | 1                               | 0                                 | undiagnosed                                      |  |
| WES39     | 1                      | sporadic           | no             | m   | adult         | elevated >1000 | yes          | CAPN3, DYSF, GNE, DNAJB6, ANOS, TTN*, VCP                                                               | 7                |                                       | Broad | 1                               | 0                                 | CAPN3                                            |  |
| WES40     | 1                      | sporadic           | no             | m   | childhood     | elevated >1000 | yes          | DMD, DNAJB6, TTN*, FHL1, SCGA, SCGB, SCGG, SCGD, LAMA2, FKRP, POMT1, POMT2, POMGnT1, FKTN, LARGE, CAPN3 | 16               |                                       | Broad | 1                               | 0                                 | undiagnosed                                      |  |
| WES41     | 1                      | sporadic           | no             | m   | childhood     | elevated <1000 | yes          | FSHD1, FSHD2, MYH7, TTN*, DNAJB6, FKRP, ANOS, VCP, DNM2, FHL1, DOK7, LMNA, CAPN3, DM2, DM1              | 15               |                                       | Broad | 1                               | 0                                 | undiagnosed                                      |  |
| WES42     | 1                      | sporadic           | no             | m   | adult         | elevated >1000 | yes          | DMD, FKRP, FSHD1, LMNA, FLH1, CAPN3, ANOS, VCP, AR, TTN*, DNAJB6                                        | 11               |                                       | Broad | 1                               | 0                                 | undiagnosed                                      |  |
| WES43     | 1                      | sporadic           | no             | m   | adult         | elevated >1000 | yes          | DES, MYOT, CRYAB, ZASP, TTN*, FKRP, CAPN3, ANOS, FSHD1, SMN1, VCP, LMNA                                 | 12               |                                       | Broad | 1                               | 0                                 | undiagnosed                                      |  |
| WES44     | 1                      | sporadic           | no             | m   | adult         | elevated >1000 | yes          | CAPN3, DNAJB6, VCP, FKRP                                                                                | 14               |                                       | Broad | 1                               | 0                                 | undiagnosed                                      |  |
| WES45     | 1                      | sporadic           | no             | m   | adult         | elevated >1000 | yes          | ANOS, VCP, DM1                                                                                          | 3                |                                       | Broad | 1                               | 0                                 | undiagnosed                                      |  |
| WES46     | 1                      | X-linked recessive | no             | m   | childhood     | elevated <1000 | yes          | ACTA1, TPM3, DNM2, MTM1, RYR1, TTN*, DNAJB6, FSHD1, LMNA                                                | 9                | hypertrophic cardiomyopathy (4 genes) | Broad | 3                               | 0                                 | novel gene (unpublished)                         |  |
| WES46     | 2                      |                    |                | f   | childhood     | not recorded   | yes          |                                                                                                         |                  |                                       |       |                                 |                                   |                                                  |  |
| WES46     | 3                      |                    |                | m   | not recorded  | elevated <1000 | yes          |                                                                                                         |                  |                                       |       |                                 |                                   |                                                  |  |
| WES47     | 1                      | AD                 | no             | f   | childhood     | elevated <1000 | yes          | LMNA, DES, MYOT, FHL1, CRYAB, ZASP, TTN*                                                                | 7                |                                       | Broad | 5                               | 0                                 | COL6A1                                           |  |
| WES47     | 2                      |                    |                | f   | childhood     | not recorded   | not recorded |                                                                                                         |                  |                                       |       |                                 |                                   |                                                  |  |
| WES47     | 3                      |                    |                | f   | childhood     | not recorded   | not recorded |                                                                                                         |                  |                                       |       |                                 |                                   |                                                  |  |
| WES47     | 4                      |                    |                | m   | childhood     | not recorded   | not recorded |                                                                                                         |                  |                                       |       |                                 |                                   |                                                  |  |
| WES47     | 5                      |                    |                | m   | childhood     | not recorded   | not recorded |                                                                                                         |                  |                                       |       |                                 |                                   |                                                  |  |
| WES48     | 1                      | AD                 | no             | m   | adult         | elevated <1000 | yes          | DES, LMNA, ZASP, CRYAB, DNM2, DNAJB6, TTN*, FKRP, CAPN3, COL6, VCP, CAV3                                | 12               |                                       | Broad | 1                               | 0                                 | novel gene (unpublished)                         |  |
| WES49     | 1                      | AD                 | no             | m   | adult         | elevated <1000 | yes          | FLNC, FHL1, LMNA, SMN1                                                                                  | 13               |                                       | Broad | 3                               | 0                                 | VCP                                              |  |
| WES49     | 2                      |                    |                | f   | adult         | normal         | no           |                                                                                                         |                  |                                       |       |                                 |                                   |                                                  |  |
| WES49     | 3                      |                    |                | m   | adult         | not recorded   | no           |                                                                                                         |                  |                                       |       |                                 |                                   |                                                  |  |
| WES50     | 1                      | sporadic           | no             | m   | adult         | elevated >1000 | yes          | DM2, LMNA, FKRP, CAPN3, ANOS, DYSF, TTN*, DNAJB6                                                        | 8                |                                       | Broad | 1                               | 0                                 | undiagnosed                                      |  |
| WES51     | 1                      | sporadic           | no             | m   | adult         | elevated <1000 | yes          | VCP, MYOT, DES, CRYAB, FHL1, ANOS, ZASP, LMNA, TTN*, EMD, FSHD1, DM2,                                   | 12               |                                       | Broad | 1                               | 0                                 | undiagnosed                                      |  |

| family no | affected individual ID | Inheritance | Consanguineous | sex | age of onset* | CK             | MB  | previous genes screened (by any method)                                          | no. genes tested | NGS gene panels tested |        | no. affected individuals exomed | no. unaffected individuals exomed | undiagnosed / relevant disease gene if diagnosed |
|-----------|------------------------|-------------|----------------|-----|---------------|----------------|-----|----------------------------------------------------------------------------------|------------------|------------------------|--------|---------------------------------|-----------------------------------|--------------------------------------------------|
| WES52     | 1                      | AD          | no             | f   | childhood     | not recorded   | no  | LMNA, CAV3, MYOT, VCP, FHL1, DNAJB6, CRYAB, ZASP, CAPN3                          | 9                |                        | Broad  | 2                               | 0                                 | COL6A3                                           |
| WES52     | 2                      |             |                | f   | childhood     | normal         | yes |                                                                                  |                  |                        |        |                                 |                                   |                                                  |
| WES53     | 1                      | AD          | no             | m   | childhood     | elevated <1000 | yes | LMNA, DES, MYOT, ZASP, CRYAB, BAG3, FHL1, DNAJB6, TTN*, MTM1                     | 10               |                        | Broad  | 1                               | 0                                 | undiagnosed                                      |
| WES54     | 1                      | sporadic    | no             | f   | childhood     | elevated >1000 | yes | LARGE, FKTN, ANOS, CAPN3                                                         | 13               |                        | Broad  | 1                               | 2                                 | undiagnosed                                      |
| WES55     | 1                      | AR          | no             | m   | childhood     | elevated <1000 | yes | FKRP, DM1, DOK7, FSHD                                                            | 4                |                        | Broad  | 1                               | 0                                 | undiagnosed                                      |
| WES56     | 1                      | sporadic    | no             | f   | childhood     | not recorded   | yes | LMNA, COL6A1, COL6A2, COL6A3                                                     | 4                |                        | Broad  | 1                               | 0                                 | STIM1                                            |
| WES57     | 1                      | sporadic    | no             | m   | childhood     | elevated <1000 | yes | LMNA, FHL1, EMD, DES, MYOT, CRYAB, ZASP                                          | 7                |                        | Broad  | 1                               | 0                                 | LMNA                                             |
| WES58     | 1                      | sporadic    | no             | f   | childhood     | normal         | yes | FKRP, DOK7, FHL1, MYH2, RYR1                                                     | 5                |                        | Broad  | 1                               | 0                                 | undiagnosed                                      |
| WES59     | 1                      | sporadic    | no             | m   | childhood     | elevated <1000 | yes | ZASP, CRYAB, MYOT, DES, EMD, LMNA, FHL1, LMNA, VCP, TTN*                         | 10               |                        | Broad  | 1                               | 0                                 | DNM2                                             |
| WES60     | 1                      | sporadic    | no             | f   | adult         | elevated <1000 | yes | VCP, MYH7, MYOM2, DNAJB6, VCP, TTN*, FSHD1, SMN1                                 | 8                |                        | Broad  | 1                               | 0                                 | undiagnosed                                      |
| WES61     | 1                      | sporadic    | no             | m   | adult         | elevated >1000 | yes | DNAJB6, TTN*, FHL1, BAG3, DES, MYOT, CRYAB, CAPN3, LMNA, EMD                     | 10               |                        | Broad  | 1                               | 0                                 | TTN                                              |
| WES62     | 1                      | sporadic    | no             | f   | childhood     | elevated <1000 | yes | LMNA, FHL1, COL6A1, COL6A2, COL6A3, EMD, BAG3                                    | 7                |                        | Broad  | 1                               | 0                                 | STIM1                                            |
| WES63     | 1                      | AD          | no             | f   | adult         | elevated <1000 | yes | DES, MYOT, ZASP, CRYAB, DM2, VCP, FHL1, SEPN1, TTN*, DNAJB6, FSHD1, PABN1, MATR3 | 13               |                        | Broad  | 1                               | 0                                 | undiagnosed                                      |
| WES64     | 1                      | sporadic    | no             | f   | childhood     | normal         | yes | LMNA, FKRP, CAPN3, SMN, FHL1, VCP                                                | 6                |                        | Broad  | 1                               | 0                                 | undiagnosed                                      |
| WES65     | 1                      | AD          | no             | m   | childhood     | elevated >1000 | yes | LMNA, FHL1, COL6A1, COL6A2, COL6A3                                               | 5                |                        | Broad  | 2                               | 0                                 | CAV3                                             |
| WES65     | 2                      |             |                | f   | childhood     | elevated <1000 | yes |                                                                                  |                  |                        |        |                                 |                                   |                                                  |
| WES66     | 1                      | sporadic    | no             | f   | childhood     | normal         | yes | RYR1, LMNA, SEPN1                                                                | 3                |                        | Broad  | 1                               | 0                                 | undiagnosed                                      |
| WES67     | 1                      | sporadic    | no             | f   | adult         | normal         | yes | CRYAB, TTN*                                                                      | 12               |                        | Broad  | 1                               | 0                                 | MTM1                                             |
| WES68     | 1                      | sporadic    | no             | m   | adult         | elevated >1000 | yes | CAPN3, DYSF, DNAJB6, FKRP, TTN*, ANOS, MYOT                                      | 7                |                        | Broad  | 1                               | 0                                 | undiagnosed                                      |
| WES69     | 1                      | sporadic    | no             | m   | childhood     | elevated <1000 | yes | EMD, FHL1, LMNA, SMN1, RYR1, VCP                                                 | 6                |                        | Broad  | 1                               | 2                                 | undiagnosed                                      |
| WES70     | 1                      | sporadic    | no             | m   | teens         | elevated >1000 | yes | ANOS, FKRP, CAV3, CAPN3                                                          | 4                |                        | Broad  | 1                               | 2                                 | undiagnosed                                      |
| WES71     | 1                      | sporadic    | no             | m   | adult         | elevated >1000 | yes | DMD, CAV3, ANOS, FKRP, FSHD1                                                     | 5                |                        | Broad  | 1                               | 0                                 | DYSF                                             |
| WES72     | 1                      | sporadic    | yes            | m   | teens         | elevated <1000 | yes | DM2, FKRP, ANOS, CAPN3, RYR1, LMNA                                               | 6                |                        | Broad  | 1                               | 0                                 | undiagnosed                                      |
| WES73     | 1                      | sporadic    | no             | m   | childhood     | elevated >1000 | yes | DOK7, COLQ, RAPSIN, TPM3, ACTA1                                                  | 5                |                        | Broad  | 1                               | 0                                 | undiagnosed                                      |
| WES74     | 1                      | AR          | no             | f   | childhood     | normal         | yes | CHAT, RAPSIN, DOK7                                                               | 3                |                        | Broad  | 1                               | 0                                 | undiagnosed                                      |
| WES75     | 1                      | AR          | yes            | m   | childhood     | elevated >1000 | yes | DMD, FKRP, SGCA, SGCB, SGCG, SGCD                                                | 6                |                        | DeCode | 2                               | 0                                 | SGCG                                             |
| WES75     | 2                      |             |                | m   | childhood     | elevated >1000 | yes |                                                                                  |                  |                        |        |                                 |                                   | SGCG                                             |

Note: \* testing of TTN was limited to sequencing of mutation hotspots associated with Hereditary Myopathy with Early Respiratory Failure and no whole gene sequencing was performed. Childhood onset denotes onset from birth to teenage years. DM1 or DM2 refer to genetic testing for Myotonic dystrophy type 1 or 2 respectively; FSHD1 or FSHD2 refers to genetic testing for Fascioscapulohumeral Muscular Dystrophy type 1 or 2.
