# Supplementary material for: Exome sequences versus sequential gene testing in the UK highly specialised Service for Limb Girdle Muscular Dystrophy
Source: Springer Nature journal article supplement (doi:10.1186/s13023-017-0699-9), 2017-09-06
Supplement: MOESM2 [file 15018514]

| family no | individual ID | Inheritance | Consanguineous | sex | age of onset | CK             | MB           | genes screened (by any method)                                                                  | number of genes tested | NGS gene panels tested                | diagnosis                                |
|-----------|---------------|-------------|----------------|-----|--------------|----------------|--------------|-------------------------------------------------------------------------------------------------|------------------------|---------------------------------------|------------------------------------------|
| STND1     | 1             | sporadic    | no             | m   | adult        | not recorded   | no           | LMNA, FHL1                                                                                      | 1                      |                                       | undiagnosed                              |
| STND2     | 1             | AD          | no             | f   | childhood    | normal         | yes          | LMNA, SMN1, SEPN1, RYR1, DES, CRYAB, MYOT, FHL1, MYH7                                           | 9                      |                                       | MHY7 related myopathy                    |
| STND3     | 1             | sporadic    | no             | m   | adult        | elevated <1000 | yes          | FKRP, CAPN3, LMNA                                                                               | 13                     |                                       | undiagnosed                              |
| STND4     | 1             | sporadic    | no             | m   | adult        | elevated <1000 | yes          | FHL1, LMNA, STIM1                                                                               | 3                      |                                       | STIM1                                    |
| STND5     | 1             | sporadic    | no             | m   | childhood    | elevated >1000 | yes          | ANOS, CAPN3, FKRP, LMNA, FSHD1, FHL1, TCAP                                                      | 7                      |                                       | LGMD2G due to TCAP mutation              |
| STND6     | 1             | sporadic    | no             | m   | adult        | elevated >1000 | yes          | CAPN3, ANOS, FKRP, DYSF, MYOT, TTN*, VCP                                                        | 7                      |                                       | undiagnosed                              |
| STND7     | 1             | sporadic    | no             | f   | adult        | elevated <1000 | yes          | FHL1, GNE, DES, MYOT                                                                            | 4                      |                                       | Desminopathy                             |
| STND8     | 1             | sporadic    | no             | f   | childhood    | normal         | yes          | LMNA, DES, TTN*, CRYAB                                                                          | 4                      |                                       | undiagnosed                              |
| STND9     | 1             | sporadic    | no             | m   | adult        | normal         | yes          | POLG, PE01, RRM2B, MYH3, DNM2                                                                   | 5                      | congenital myopathies (22 genes)      | undiagnosed                              |
| STND10    | 1             | sporadic    | yes            | m   | childhood    | elevated >1000 | yes          | MYH7, ANOS, FKRP, CAPN3                                                                         | 5                      |                                       | undiagnosed                              |
| STND11    | 1             | sporadic    | no             | f   | childhood    | elevated >1000 | yes          | ANOS, DMD, SGCA, SGCB, SGCD, SGCG, FKRP, CAPN3, ANOS, ORAI1, STIM1                              | 6                      |                                       | undiagnosed                              |
| STND12    | 1             | sporadic    | no             | f   | adult        | elevated >1000 | yes          | ANOS, FKRP, CAPN3, MYOT, DES, CRYAB, ZASP, TTN*, VCP, DNAJB6                                    | 10                     |                                       | undiagnosed                              |
| STND14    | 1             | sporadic    | no             | m   | adult        | elevated <1000 | yes          | DES, GNE, DM1, DM2, MYH7, MYOT, CRYAB, DES, ZASP, TTN*, FSHD1                                   | 11                     |                                       | undiagnosed                              |
| STND15    | 1             | AD          | no             | m   | childhood    | normal         | yes          | MYH7, DMD, FKRP, LMNA, FHL1, VCP, ZASP, CRYAB, MYOT, DES, ANOS, TTN*                            | 12                     |                                       | undiagnosed                              |
| STND16    | 1             | sporadic    | no             | f   | adult        | normal         | yes          | LMNA, RYR1                                                                                      | 2                      | congenital myopathies (22 genes)      | undiagnosed                              |
| STND17    | 1             | sporadic    | no             | m   | adult        | elevated >1000 | yes          | ANOS, FHL1, FKRP, TTN*, GNE, CAPN3, DYSF                                                        | 7                      |                                       | undiagnosed                              |
| STND18    | 1             | AR          | no             | f   | childhood    | elevated <1000 | yes          | CAPN3, LMNA, TTN*, COL6A1, COL6A2, COL6A3                                                       | 6                      |                                       | collagen VI related disease              |
| STND18    | 2             | AR          | no             | m   | childhood    | elevated <1000 | yes          |                                                                                                 |                        |                                       | collagen VI related disease              |
| STND19    | 1             | sporadic    | no             | f   | adult        | not recorded   | yes          | LMNA, DES, MYOT, CRYAB, ZASP, TTN* MYH7                                                         | 13                     |                                       | undiagnosed                              |
| STND20    | 1             | sporadic    | no             | m   | childhood    | normal         | yes          | CAPN3, LMNA, FHL1, EMD                                                                          | 4                      |                                       | undiagnosed                              |
| STND21    | 1             | sporadic    | no             | m   | adult        | normal         | yes          | FSHD1, VCP, FHL1, FSHD2                                                                         | 4                      |                                       | FSHD2                                    |
| STND22    | 1             | AR          | yes            | f   | childhood    | not recorded   | yes          | COL6A1, COL6A2, COL6A3                                                                          | 3                      |                                       | collagen VI related disease              |
| STND22    | 2             | AR          | yes            | f   | childhood    | elevated <1000 | yes          |                                                                                                 |                        |                                       | collagen VI related disease              |
| STND23    | 1             | AD          | no             | m   | childhood    | normal         | yes          | MYH7, LMNA, DES, MYOT, CRYAB, ZASP, TTN*, VCP                                                   | 8                      |                                       | undiagnosed                              |
| STND24    | 1             | sporadic    | no             | f   | adult        | normal         | yes          | MYH7, MYOT, CRYAB, VCP, FHL1, ZASP, PMP22                                                       | 7                      | peripheral neuropathies (56 genes)    | CMT2A due to MFN2 mutation               |
| STND25    | 1             | sporadic    | no             | m   | childhood    | normal         | yes          | LMNA, CAPN3, DM2, FSHD1, ANOS, DYSF                                                             | 6                      |                                       | undiagnosed                              |
| STND26    | 1             | sporadic    | no             | m   | adult        | not recorded   | yes          | FSHD1, LMNA, VCP                                                                                | 3                      |                                       | VCP myopathy                             |
| STND27    | 1             | sporadic    | no             | m   | adult        | elevated <1000 | yes          | DM2, CAPN3, FSHD1, DMD                                                                          | 4                      |                                       | undiagnosed                              |
| STND28    | 1             | sporadic    | no             | f   | adult        | elevated >1000 | yes          | DM1, TTN*, FSHD1, LMNA, DNM2, DES, ZASP, CRYAB, MYOT                                            | 9                      |                                       | undiagnosed                              |
| STND29    | 1             | sporadic    | no             | m   | adult        | normal         | yes          | McArdles, TTN*, CAPN3                                                                           | 3                      |                                       | undiagnosed                              |
| STND30    | 1             | sporadic    | no             | f   | adult        | normal         | yes          | LMNA                                                                                            | 1                      |                                       | undiagnosed                              |
| STND31    | 1             | sporadic    | no             | m   | adult        | elevated >1000 | yes          | DMD, FKRP, ANOS                                                                                 | 3                      | hypertrophic cardiomyopathy (4 genes) | undiagnosed                              |
| STND32    | 1             | sporadic    | no             | m   | childhood    | not recorded   | no           | CHRNE, RAPSIN, DOK7, CHRNA1, CHRND, CHRNB1                                                      | 6                      |                                       | CHRNB1 -slow channel myasthenic syndrome |
| STND33    | 1             | sporadic    | no             | m   | adult        | elevated >1000 | yes          | CAV3, DM2, FKRP, ANOS, CAPN3                                                                    | 6                      |                                       | undiagnosed                              |
| STND34    | 1             | AR          | no             | f   | childhood    | normal         | yes          | DM1, DM2, FSHD1, FSHD2, SMN1                                                                    | 5                      |                                       | SMA                                      |
| STND35    | 1             | sporadic    | no             | m   | childhood    | elevated <1000 | yes          | FSHD1, CAPN3, FHL1, FSHD2, LMNA, EMD, ANOS                                                      | 7                      |                                       | undiagnosed                              |
| STND36    | 1             | sporadic    | no             | f   | childhood    | elevated >1000 | yes          | CAPN3                                                                                           | 1                      |                                       | LGMD2A due to CAPN3 mutation             |
| STND37    | 1             | sporadic    | no             | f   | adult        | elevated <1000 | yes          | DMD, ANOS, CAPN3                                                                                | 3                      |                                       | LGMD2A due to CAPN3 mutation             |
| STND38    | 1             | AD          | no             | m   | childhood    | not recorded   | not recorded | FSHD1                                                                                           | 1                      |                                       | FSHD1                                    |
| STND39    | 1             | sporadic    | no             | f   | adult        | elevated >1000 | yes          | TTN*, MYH7, RYR1, DM1                                                                           | 4                      |                                       | undiagnosed                              |
| STND40    | 1             | sporadic    | no             | f   | adult        | elevated <1000 | yes          | FKRP, CAPN3, POMT1, POMT2, LARGE, FKTN, POMGnT1, DES, LMNA, ANOS, TTN*, MYOT, CRYAB, ZASP, FHL1 | 15                     |                                       | FHL1                                     |
| STND41    | 1             | sporadic    | no             | m   | childhood    | elevated <1000 | yes          | FSHD1, CAV3, DMD, PYGM                                                                          | 4                      |                                       | undiagnosed                              |

| family no | individual ID | Inheritance | Consanguineous | sex | age of onset | CK             | MB  | genes screened (by any method)                                             | number of genes tested | NGS gene panels tested                     | diagnosis                           |
|-----------|---------------|-------------|----------------|-----|--------------|----------------|-----|----------------------------------------------------------------------------|------------------------|--------------------------------------------|-------------------------------------|
| STND42    | 1             | sporadic    | no             | m   | childhood    | normal         | yes | <i>DOK7, RAPSN</i>                                                         | 2                      | ataxias research panel                     | undiagnosed                         |
| STND43    | 1             | sporadic    | no             | f   | adult        | elevated >1000 | yes | <i>RYR1</i>                                                                | 1                      |                                            | <i>RYR1</i> related myopathy        |
| STND44    | 1             | sporadic    | no             | f   | adult        | normal         | yes | <i>DES, MYOT, CRYAB, ZASP, TTN*, MYH7, VCP, PABN1, MATR3</i>               | 9                      |                                            | undiagnosed                         |
| STND45    | 1             | sporadic    | no             | f   | childhood    | elevated >1000 | yes | <i>LMNA, FSHD1, DMD, SMN1</i>                                              | 4                      | congenital muscular dystrophies (31 genes) | undiagnosed                         |
| STND46    | 1             | sporadic    | no             | m   | childhood    | normal         | yes | <i>DES, MYOT, CRYAB, ZASP, LMNA, RYR1</i>                                  | 6                      |                                            | undiagnosed                         |
| STND47    | 1             | sporadic    | no             | m   | adult        | elevated >1000 | yes | <i>DMD, FKR, CAPN3, DYSF</i>                                               | 4                      |                                            | Dysferlinopathy                     |
| STND48    | 1             | AR          | no             | f   | adult        | elevated >1000 | no  | <i>ANOS, DYSF</i>                                                          | 2                      |                                            | Dysferlinopathy                     |
| STND48    | 2             | AR          | no             | f   | adult        | elevated >1000 | yes |                                                                            |                        |                                            | LGMD2B due to <i>DYSF</i> mutations |
| STND48    | 3             | AR          | no             | m   | adult        | elevated >1000 | no  |                                                                            |                        |                                            | LGMD2B due to <i>DYSF</i> mutations |
| STND49    | 1             | sporadic    | no             | m   | adult        | elevated <1000 | yes | <i>TTN exon 334, CRYAB, MYOT, DES, TCAP, ZASP, GNE</i>                     | 7                      |                                            | undiagnosed                         |
| STND50    | 1             | sporadic    | no             | f   | adult        | elevated <1000 | yes | <i>RYR1, VCP, FHL1, LMNA, DM2, CFL2, MYH7, MTM1, CFL2, RYR1, FSHD1 DM2</i> | 12                     |                                            | undiagnosed                         |
| STND51    | 1             | X-linked    | no             | m   | childhood    | elevated >1000 | yes | <i>SEPN1, LMNA, RYR1, FHL1, FKR, MYH7</i>                                  | 6                      |                                            | undiagnosed                         |
| STND52    | 1             | sporadic    | no             | m   | childhood    | normal         | yes | <i>LMNA, COL6A1, COL6A2, COL6A3,</i>                                       | 4                      |                                            | undiagnosed                         |
| STND53    | 1             | sporadic    | no             | f   | childhood    | elevated <1000 | yes | <i>SGCA, SGCB, SGCD, SGCG, CAPN3, DM2, TCAP, ANOS, FKR, GNE</i>            | 10                     |                                            | undiagnosed                         |
| STND54    | 1             | sporadic    | no             | m   | adult        | elevated >1000 | yes | <i>TTN HMEF c.m., CAPN3, DYSF, MYOT, FKR, ANOS</i>                         | 6                      |                                            | undiagnosed                         |
| STND55    | 1             | AD          | no             | f   | adult        | not recorded   | yes | <i>LMNA, COL6A1, COL6A2, COL6A3,</i>                                       | 4                      |                                            | undiagnosed                         |
| STND56    | 1             | sporadic    | no             | f   | childhood    | not recorded   | no  | <i>LMNA, FHL1</i>                                                          | 2                      |                                            | undiagnosed                         |
| STND57    | 1             | sporadic    | no             | f   | adult        | elevated >1000 | yes | <i>ANOS, FSHD1, DMD</i>                                                    | 3                      |                                            | DMD manifesting carrier             |
| STND58    | 1             | sporadic    | no             | m   | adult        | elevated >1000 | yes | <i>CAPN3, ANOS, FKR, MYOT, ZASP, DES, TTN HMERRF, c.m., DYSF</i>           | 8                      |                                            | undiagnosed                         |
| STND59    | 1             | sporadic    | no             | f   | adult        | elevated <1000 | yes | <i>FSHD1</i>                                                               | 1                      | congenital myopathies (22 genes)           | undiagnosed                         |
| STND60    | 1             | AD          | no             | f   | childhood    | normal         | no  | <i>m.3243A&gt;G MELAS mutation, GCH1</i>                                   | 2                      |                                            | GCH1 deletion dystonia              |
| STND60    | 2             | AD          | no             | f   | childhood    | normal         | no  |                                                                            |                        |                                            | GCH1 deletion dystonia              |
| STND60    | 3             | AD          | no             | f   | childhood    | normal         | no  |                                                                            |                        |                                            | GCH1 deletion dystonia              |
| STND61    | 1             | sporadic    | no             | f   | adult        | elevated >1000 | yes | <i>BAG3, FKR, ANOS, CAPN3</i>                                              | 4                      |                                            | undiagnosed                         |
| STND62    | 1             | sporadic    | no             | f   | adult        | elevated >1000 | yes | <i>ZASP, DES, MYOT, CRYAB, TTN*, LMNA, DM2</i>                             | 7                      |                                            | undiagnosed                         |
| STND63    | 1             | sporadic    | yes            | m   | adult        | elevated >1000 | no  | <i>ANOS, DYSF</i>                                                          | 2                      |                                            | Dysferlinopathy                     |
| STND64    | 1             | sporadic    | no             | m   | adult        | elevated <1000 | yes | <i>FSHD1 NEB, MYH7, CAPN3</i>                                              | 4                      | peripheral neuropathies (56 genes), titin  | undiagnosed                         |
| STND65    | 1             | sporadic    | no             | m   | adult        | elevated <1000 | yes | <i>DES, MYOT, ZASP, CRYAB</i>                                              | 4                      |                                            | Myotilinopathy                      |
| STND66    | 1             | sporadic    | no             | f   | adult        | elevated >1000 | yes | <i>DM2, ANOS, FKR, CAPN3</i>                                               | 4                      |                                            | undiagnosed                         |
| STND67    | 1             | sporadic    | no             | m   | childhood    | elevated <1000 | no  | <i>COL6A1, COL6A2, COL6A3</i>                                              | 3                      |                                            | Collagen VI related disease         |
| STND68    | 1             | AR          | yes            | m   | childhood    | normal         | yes | <i>CYP7B1</i>                                                              | 1                      | muscle channelopathies (4 genes)           | HSP type 5A                         |
| STND69    | 1             | sporadic    | no             | f   | adult        | elevated <1000 | yes | <i>GAA, DES, ZASP, MYOT, CRYAB, TTN*, VCP</i>                              | 7                      | peripheral neuropathies (56 genes)         | undiagnosed                         |
| STND70    | 1             | AD          | no             | m   | adult        | normal         | yes | <i>TTN*, DES, CRYAB, ZASP, MYOT, VCP, LMNA, FSHD1, GNE</i>                 | 9                      |                                            | undiagnosed                         |
| STND71    | 1             | sporadic    | no             | m   | adult        | elevated <1000 | yes | <i>TTN*, DES, CRYAB, ZASP, MYOT, LMNA</i>                                  | 6                      | titin                                      | undiagnosed                         |
| STND72    | 1             | sporadic    | no             | m   | adult        | normal         | yes | <i>GNE, DES, MYOT, ZASP, CRYAB, TTN*, MYH7, VCP,</i>                       | 8                      |                                            | undiagnosed                         |
| STND73    | 1             | sporadic    | no             | m   | adult        | normal         | no  | <i>DMD, FKR</i>                                                            | 2                      |                                            | undiagnosed                         |
| STND74    | 1             | AD          | no             | m   | adult        | elevated >1000 | yes | <i>ZASP, CRYAB, DES, MYOT, TTN*</i>                                        | 5                      |                                            | Myotilinopathy                      |
| STND75    | 1             | sporadic    | no             | m   | childhood    | normal         | yes | <i>TTN*, SEPN1, LMNA, EMD, FHL1, RYR1</i>                                  | 6                      | titin                                      | undiagnosed                         |
| STND76    | 1             | sporadic    | no             | m   | childhood    | normal         | yes | <i>LMNA, SMN1, FSHD1</i>                                                   | 3                      |                                            | undiagnosed                         |
| STND77    | 1             | sporadic    | no             | f   | childhood    | elevated >1000 | yes | <i>CAPN3</i>                                                               | 1                      |                                            | LGMD2A due to <i>CAPN3</i> mutation |
| STND77    | 1             | AR          | no             | m   | childhood    | normal         | yes | <i>LMNA, MYH7</i>                                                          | 2                      |                                            | undiagnosed                         |
| STND77    | 2             | AR          | no             | m   | childhood    | normal         | yes |                                                                            |                        | congenital myopathies (22 genes)           | undiagnosed                         |
| STND79    | 1             | sporadic    | no             | m   | childhood    | normal         | no  | <i>LMNA, EMD, FBN1</i>                                                     | 3                      |                                            | undiagnosed                         |

| family no | individual ID | Inheritance | Consanguineous | sex | age of onset | CK             | MB  | genes screened (by any method)                                                         | number of genes tested | NGS gene panels tested        | diagnosis           |
|-----------|---------------|-------------|----------------|-----|--------------|----------------|-----|----------------------------------------------------------------------------------------|------------------------|-------------------------------|---------------------|
| STND80    | 1             | AD          | no             | m   | adult        | elevated <1000 | yes | <i>LMNA, DNAJB6, FLNC, ZASP, CRYAB, DES, MYOT, TTN*</i> , <i>COLA1, COL6A2, COL6A3</i> | 11                     |                               | undiagnosed         |
| STND81    | 1             | sporadic    | no             | m   | adult        | elevated <1000 | yes | <i>DM2, TTN*</i> , <i>GNE</i>                                                          | 1                      |                               | <i>GNE</i> myopathy |
| STND82    | 1             | sporadic    | no             | m   | adult        | elevated >1000 | yes | <i>ANOS, CAPN3, FSHD1 CAV3, DM2</i>                                                    | 5                      | rhabdomyolysis research panel | undiagnosed         |
| STND83    | 1             | AR          | no             | m   | adult        | elevated >1000 | yes | <i>FKRP, CAPN3, DYSF, ANOS, FSHD1 STIM1, ORAI1, DM2</i>                                | 8                      |                               | undiagnosed         |
| STND84    | 1             | sporadic    | yes            | m   | adult        | elevated >1000 | yes | <i>ANOS, VCP, GNE</i>                                                                  | 3                      |                               | <i>GNE</i> myopathy |

Note: \* testing of TTN was limited to sequencing of mutation hotspots associated with Hereditary Myopathy with Early Respiratory Failure and no whole gene sequencing was performed. Childhood onset denotes onset from birth to teenage years. DM1 or DM2 refer to genetic testing for Myotonic dystrophy type 1 or 2 respectively; FSHD1 or FSHD2 refers to genetic testing for Fascioscapulohumeral Muscular Dystrophy type 1 or 2.
